# Supplementary figures and images for: FeS/FeNC decorated N,S-co-doped porous carbon for enhanced ORR activity in alkaline media
Source: Royal Society of Chemistry journal article supplement (doi:10.1039/d0cc04749j), 2020-01-01

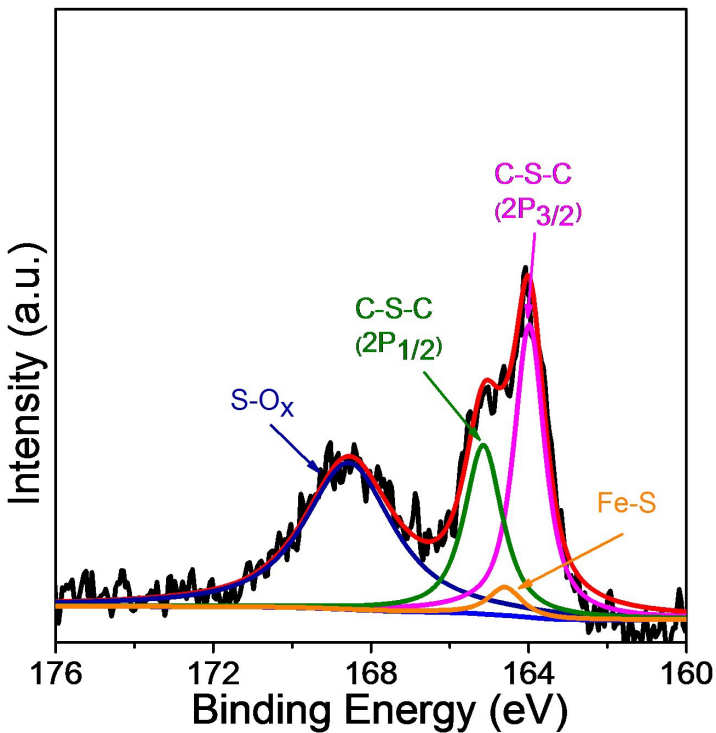

Supplement: d0cc04749j10.pdf [file d0cc04749j10.pdf]

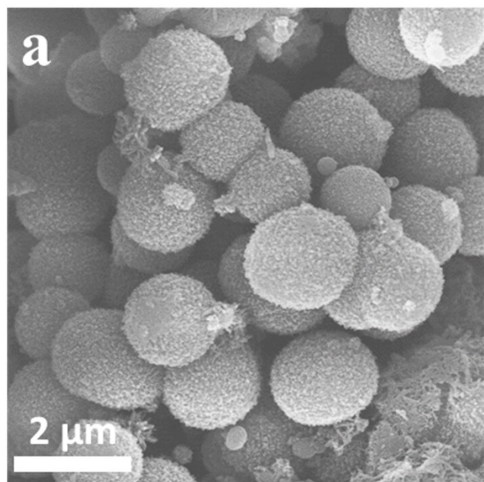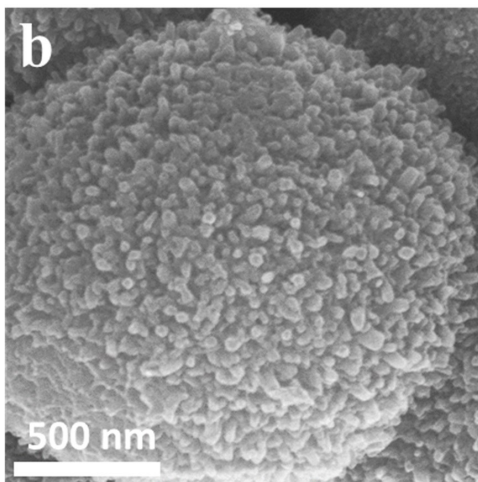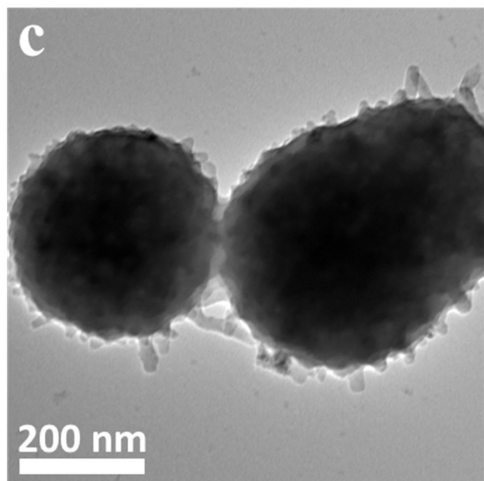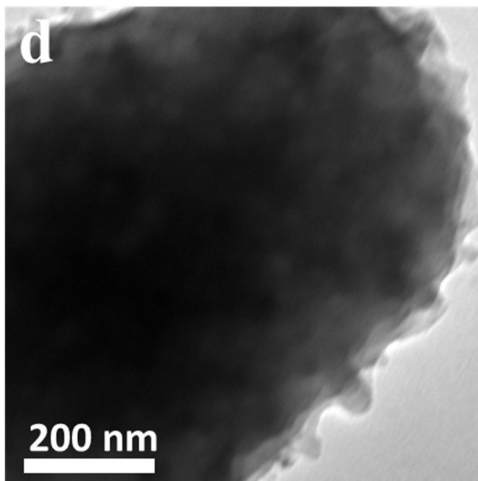

Supplement: d0cc04749j11.pdf [file d0cc04749j11.pdf]

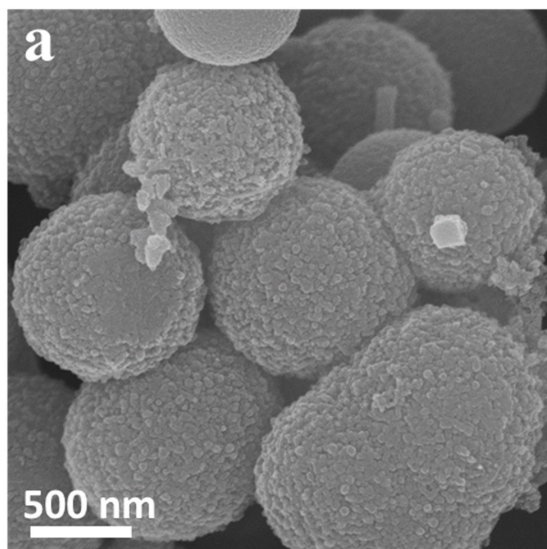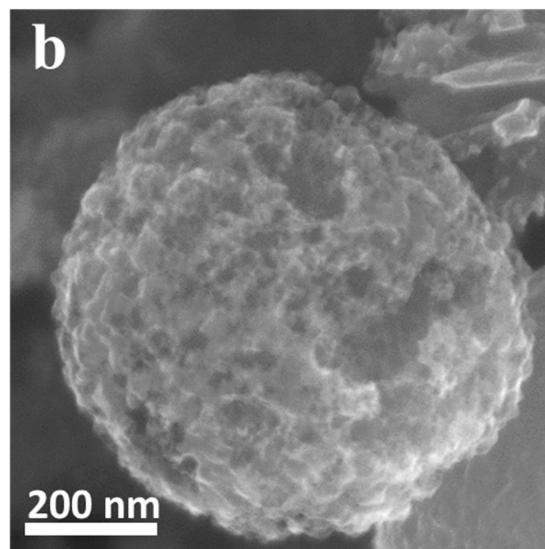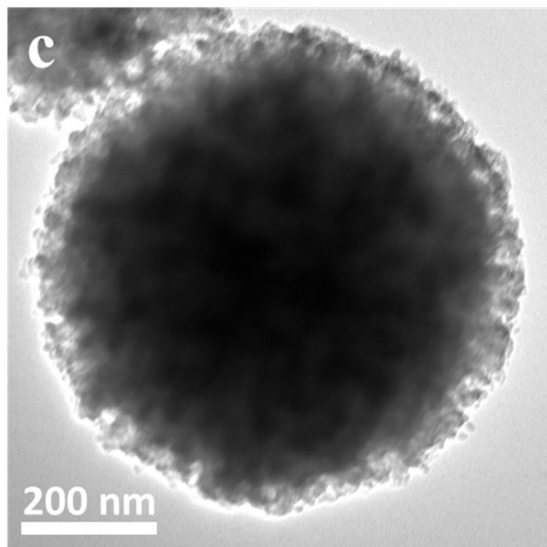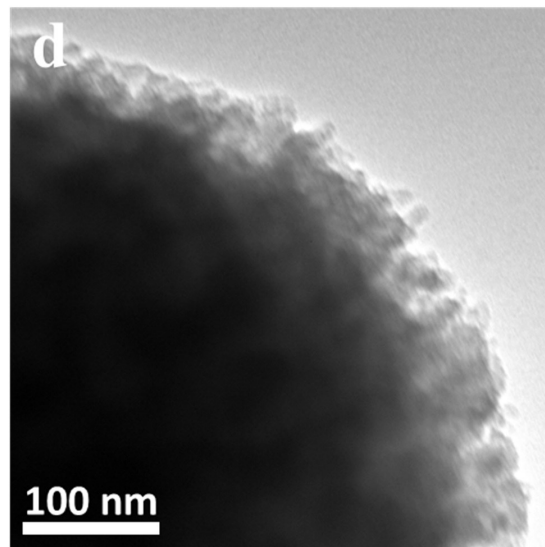

Supplement: d0cc04749j12.pdf [file d0cc04749j12.pdf]

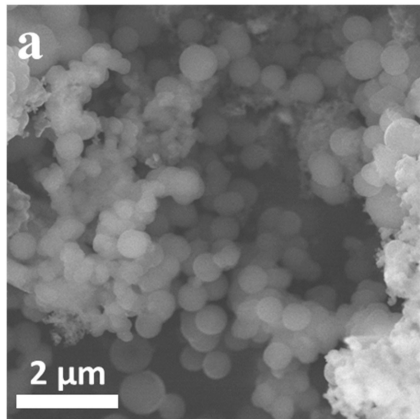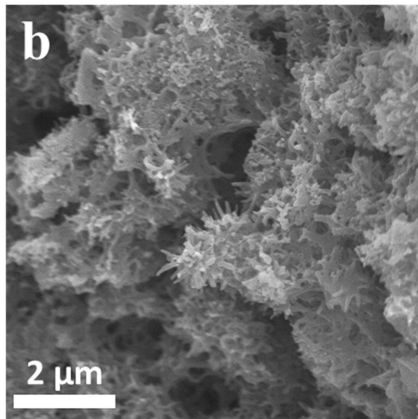

Supplement: d0cc04749j13.pdf [file d0cc04749j13.pdf]

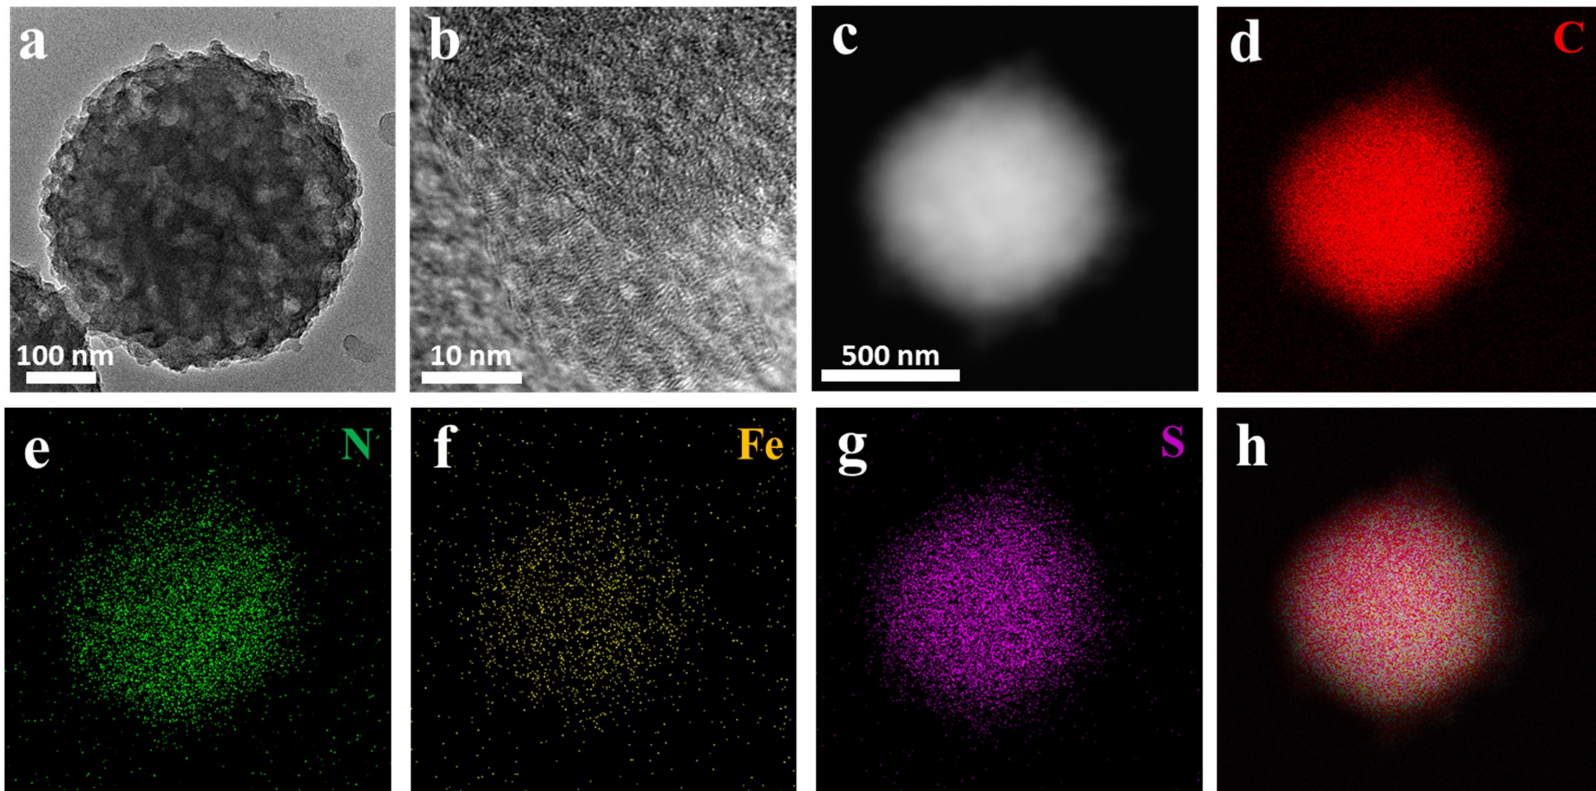

Supplement: d0cc04749j14.pdf [file d0cc04749j14.pdf]

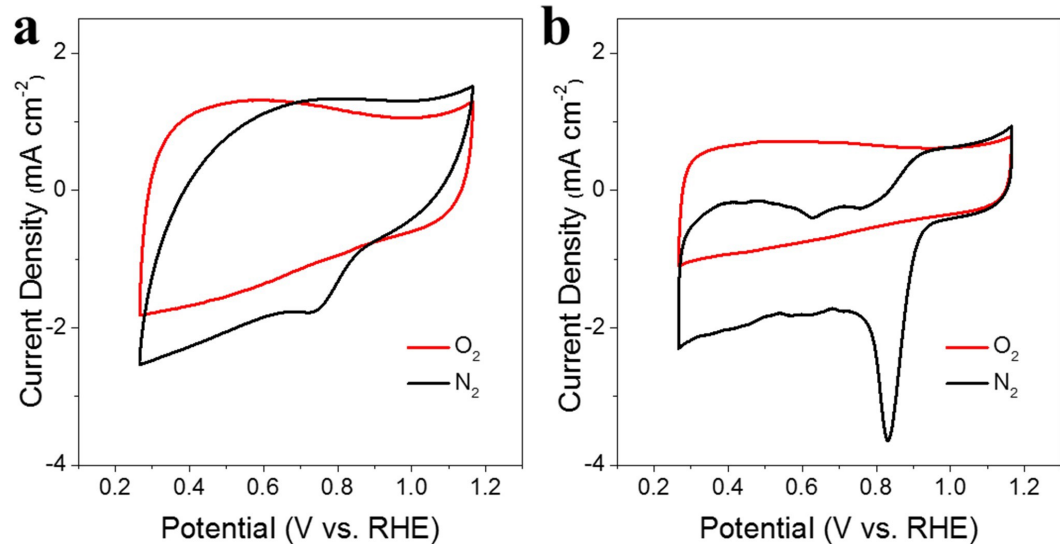

Supplement: d0cc04749j15.pdf [file d0cc04749j15.pdf]

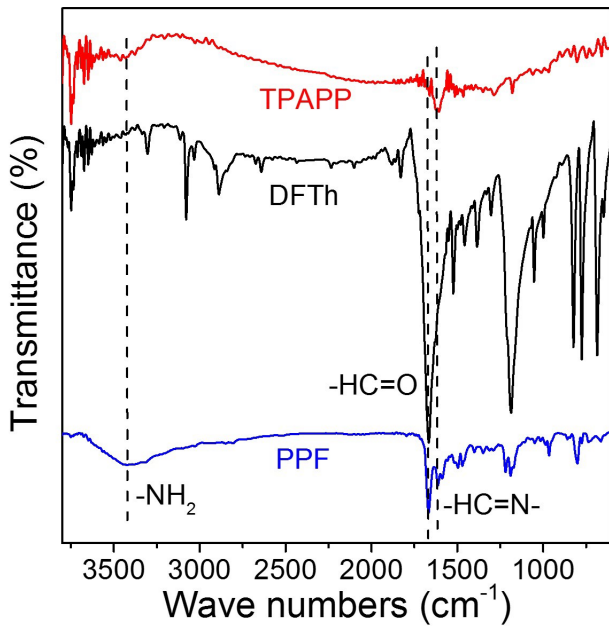

Supplement: d0cc04749j2.pdf [file d0cc04749j2.pdf]

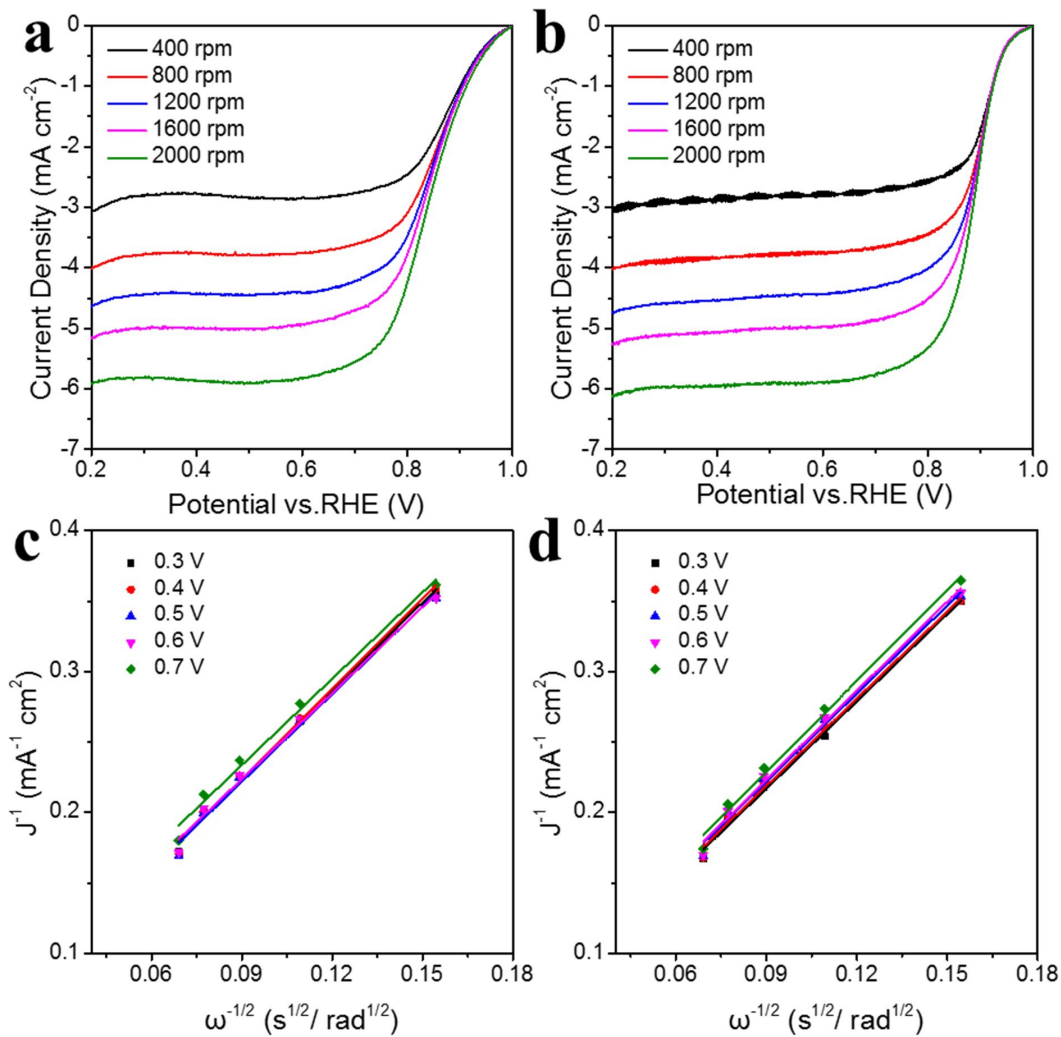

Supplement: d0cc04749j3.pdf [file d0cc04749j3.pdf]

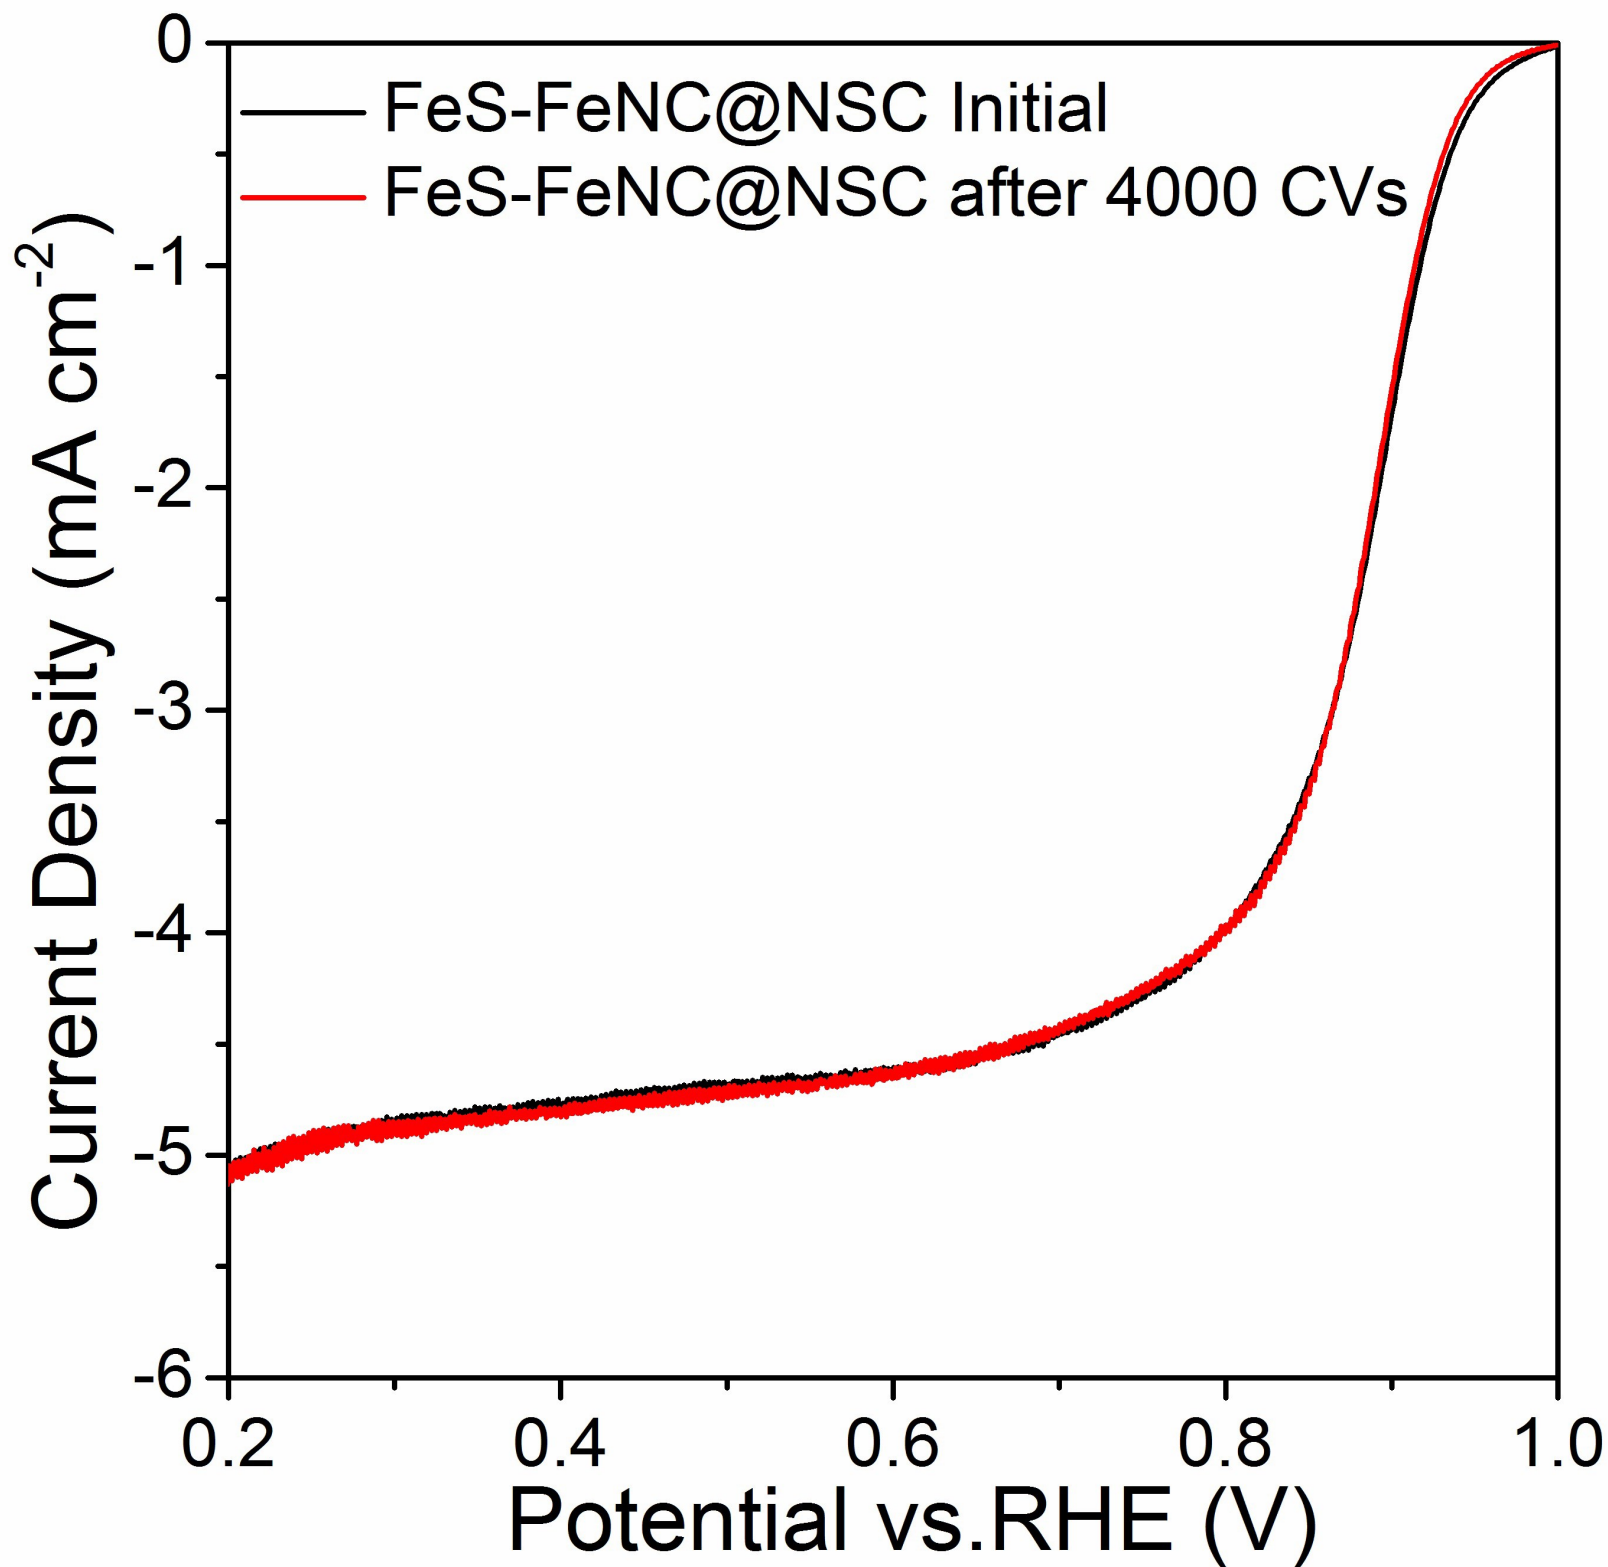

Supplement: d0cc04749j4.pdf [file d0cc04749j4.pdf]

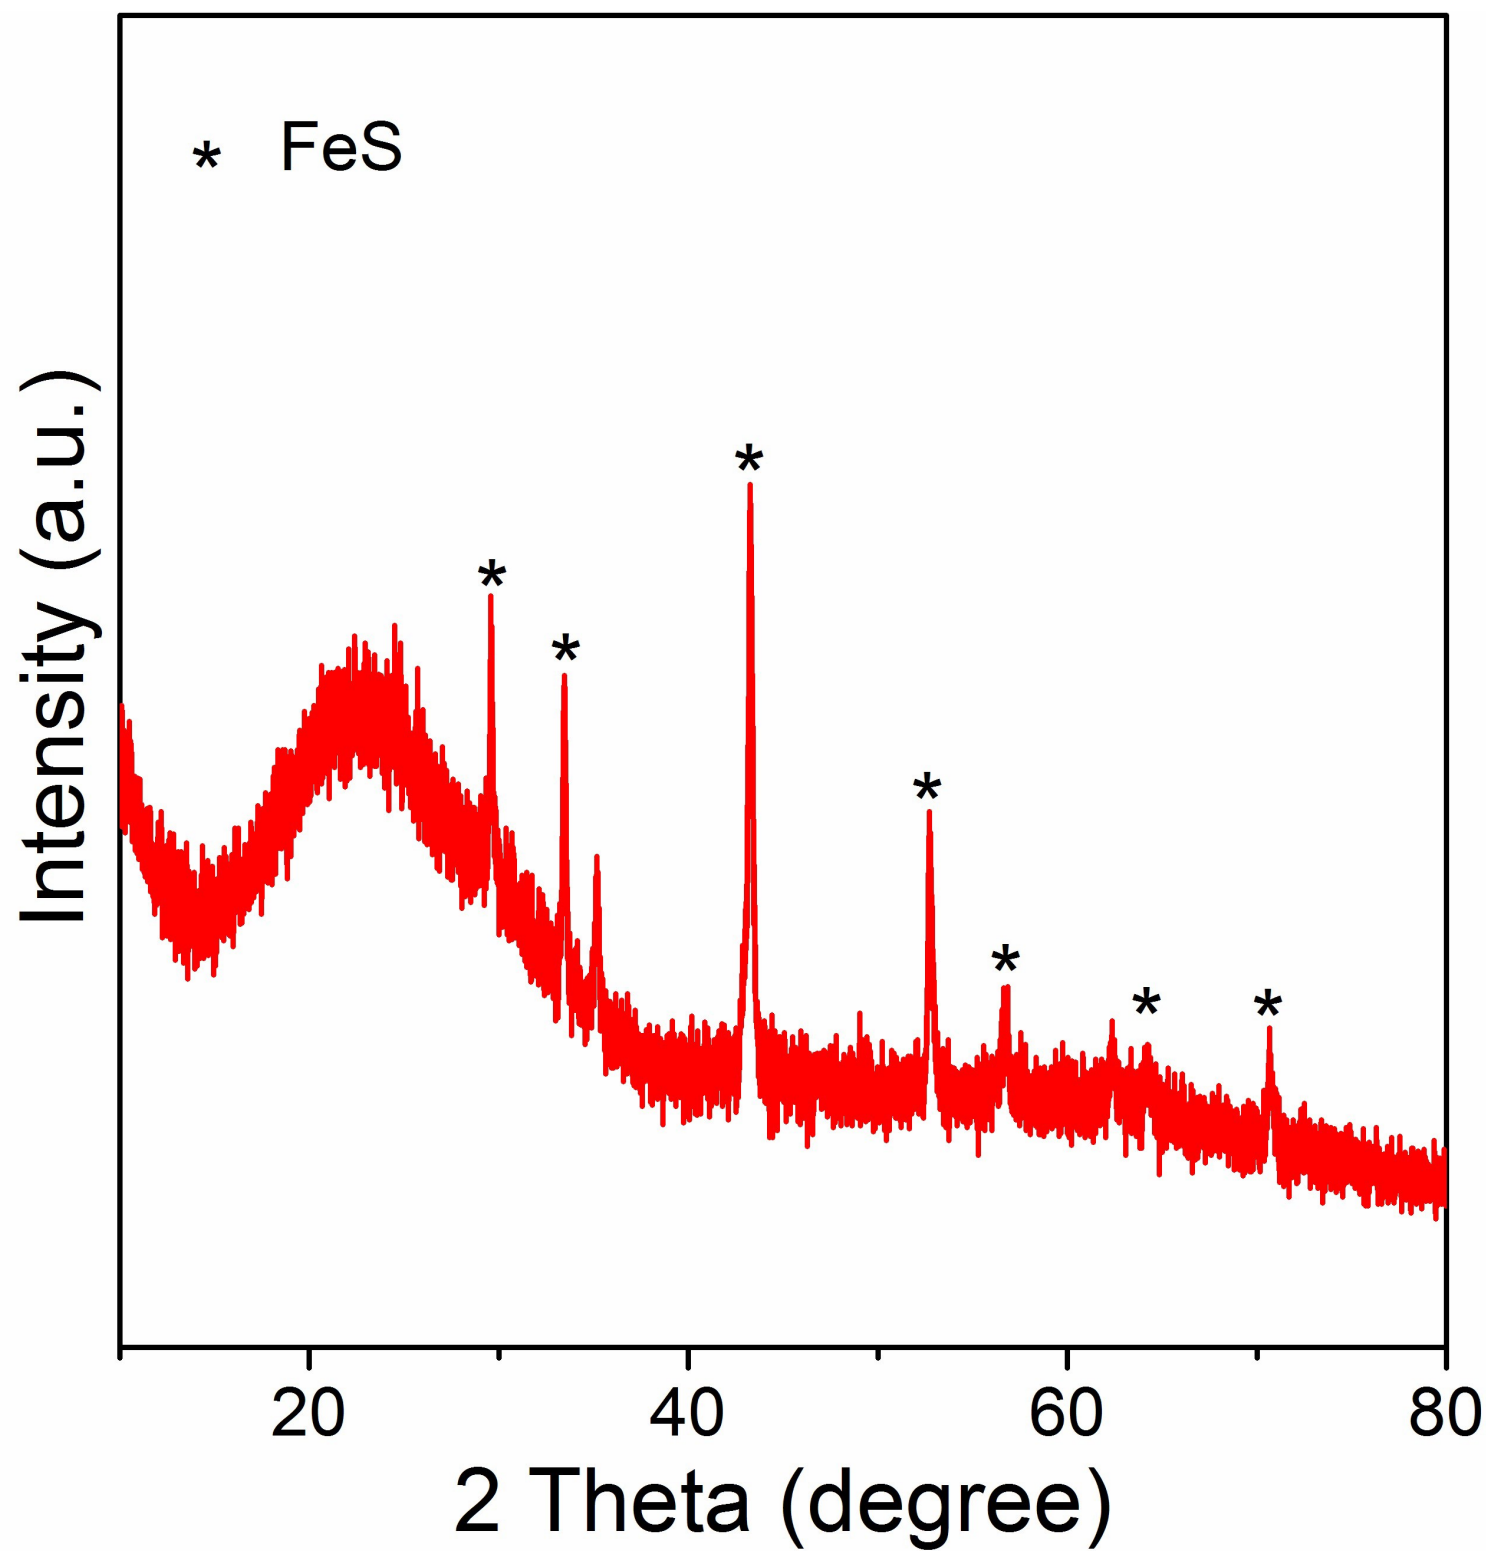

Supplement: d0cc04749j5.pdf [file d0cc04749j5.pdf]

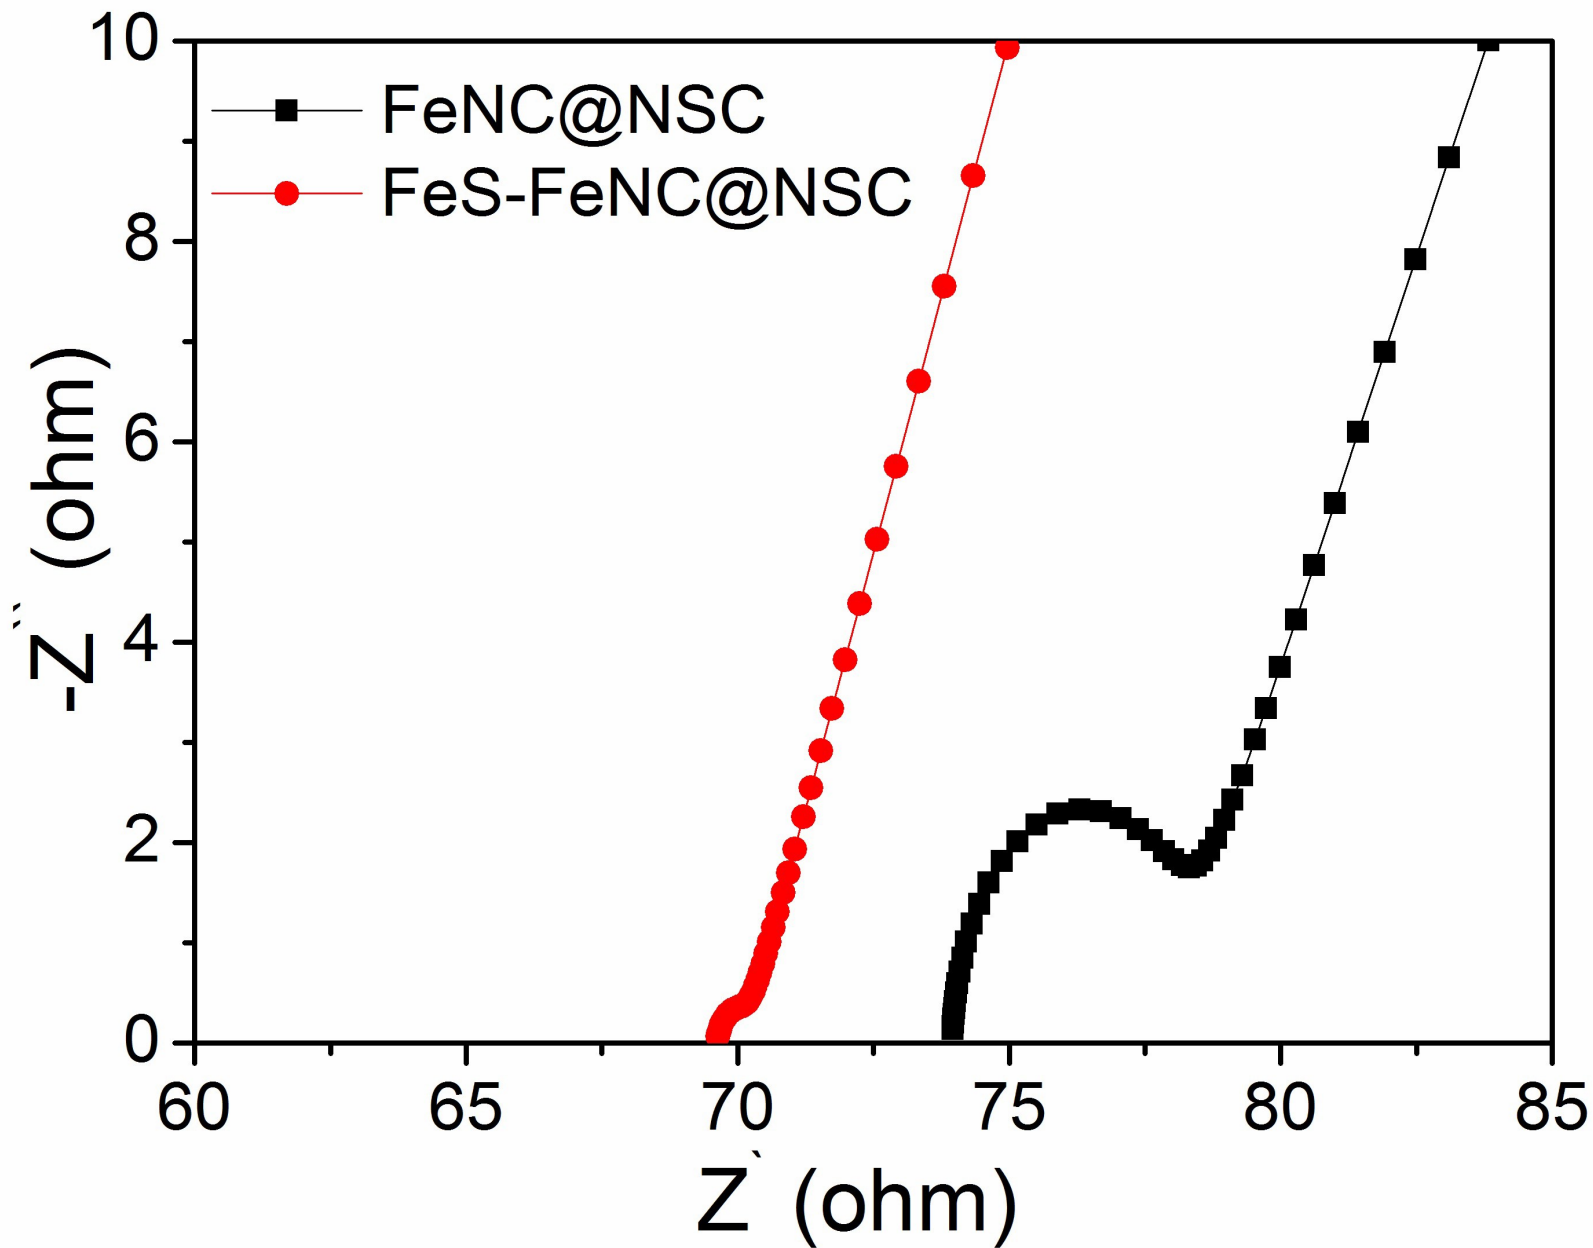

Supplement: d0cc04749j6.pdf [file d0cc04749j6.pdf]

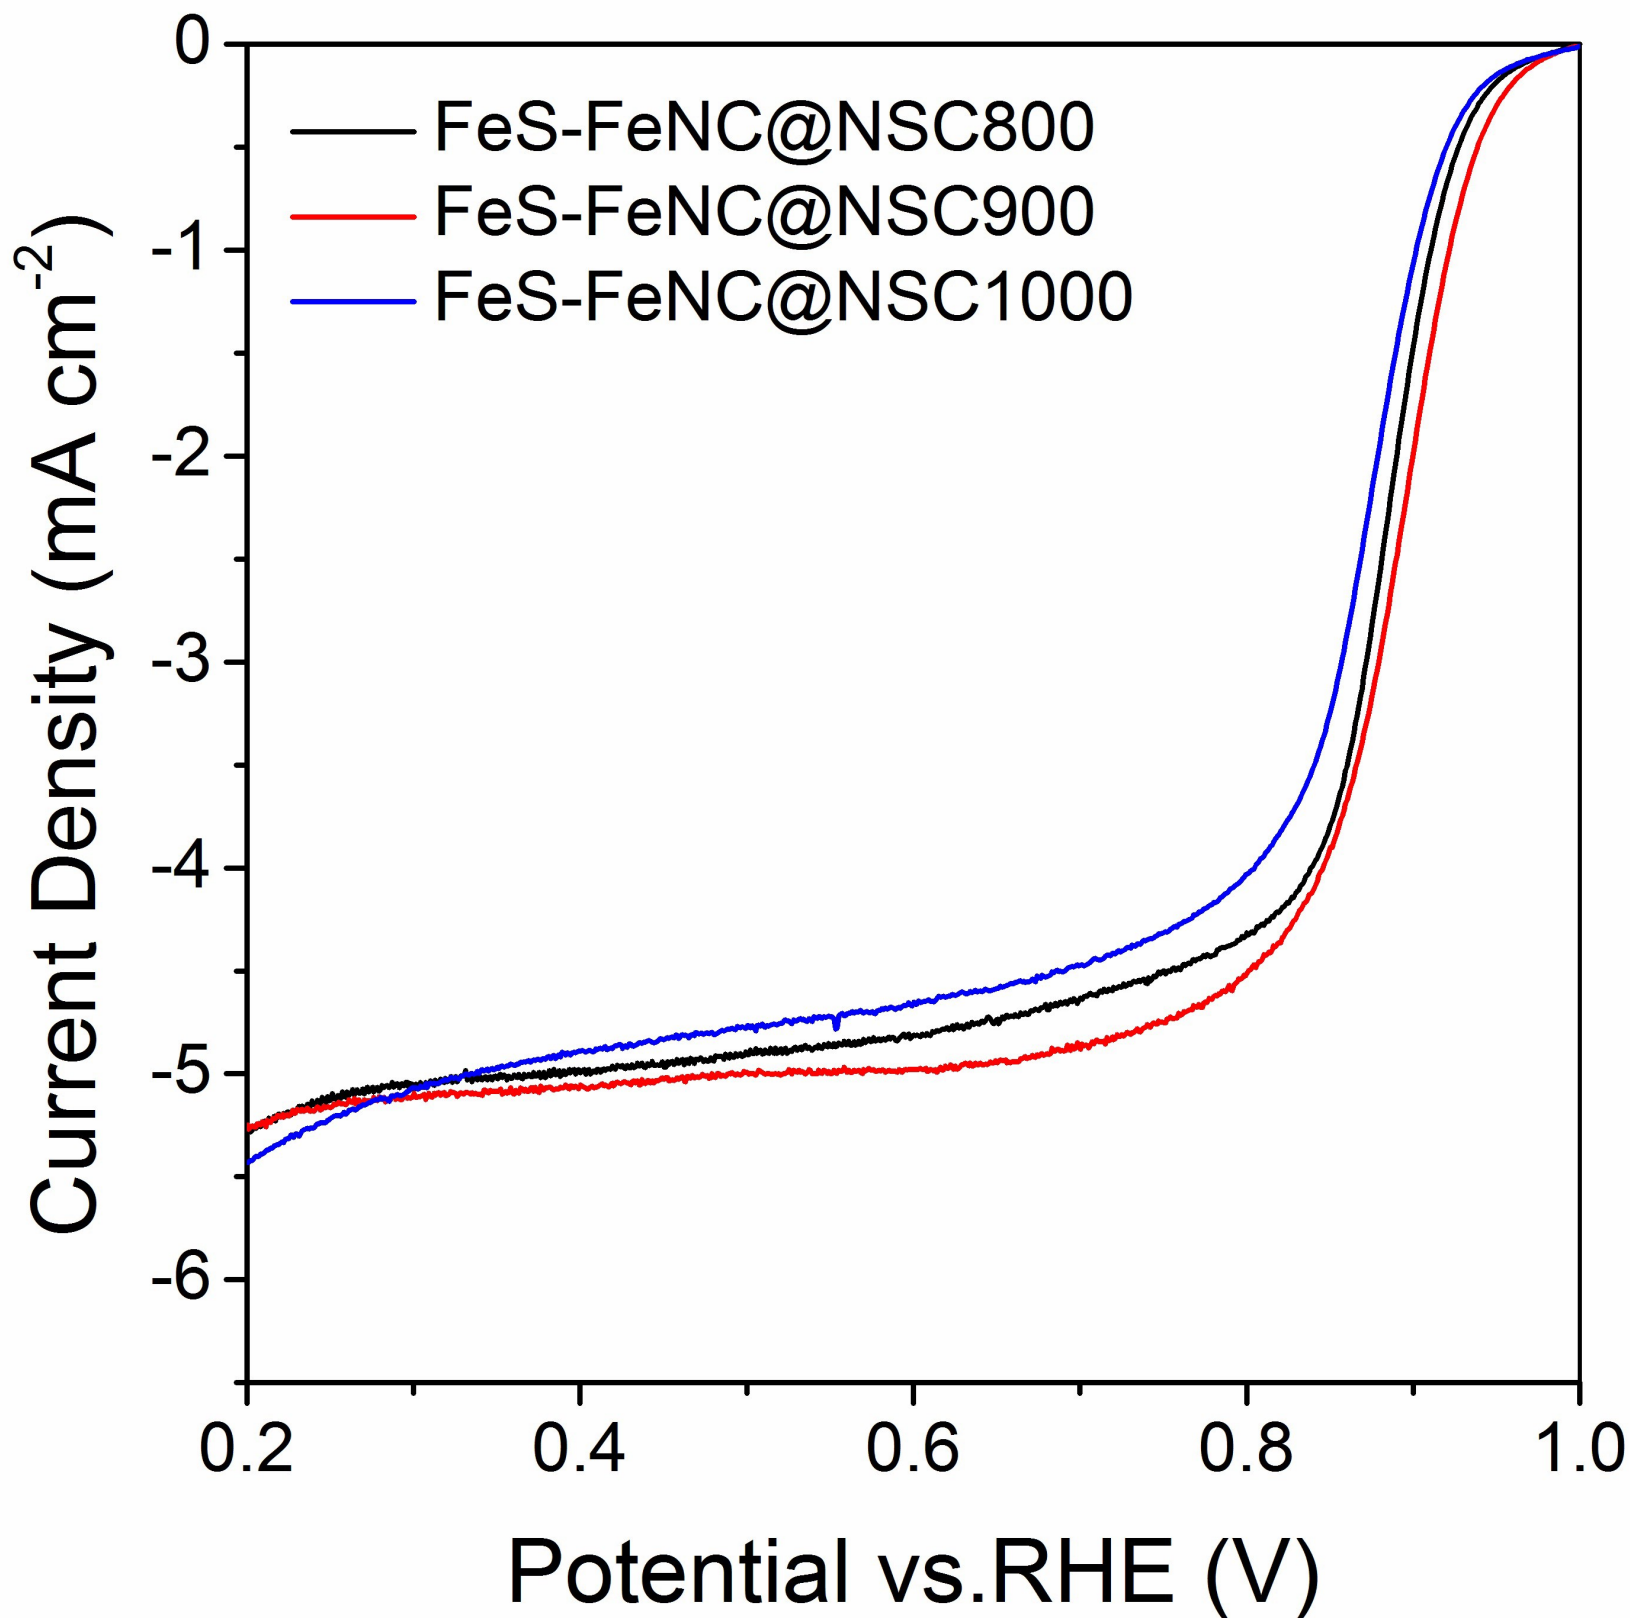

Supplement: d0cc04749j7.pdf [file d0cc04749j7.pdf]

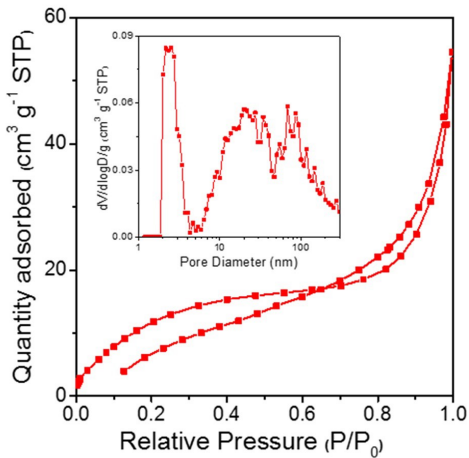

Supplement: d0cc04749j8.pdf [file d0cc04749j8.pdf]

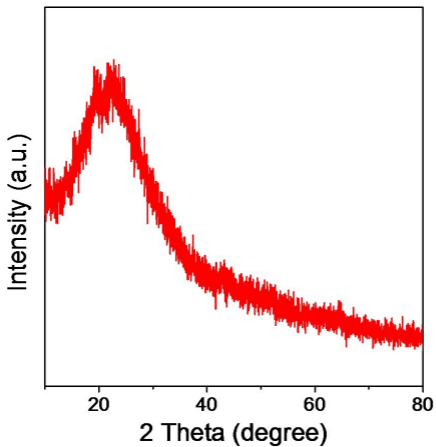

Supplement: d0cc04749j9.pdf [file d0cc04749j9.pdf]
